# Supplementary material for: Non-interpenetrating honeycomb-like 2D [6,3] network built by a novel trigonal metalloligand
Source: Royal Society of Chemistry journal article supplement (doi:10.1039/b409596k), 2004-01-01
Supplement: b409596k.doc [file b409596k.doc]

Supplementary material (ESI) for Chemical Communications

**Non-interpenetrating honeycomb-like 2D [6,3] network built by a novel trigonal metalloligand**

Kyoung-Tae Youm,*a* Seong Huh,*b* Young Jun Park,*a* Sangwoo Park,*a* Moon-Gun Choi*a* and Moo-Jin Jun**a*

*a Department of Chemistry, Yonsei University, Seoul 120-749, Korea. Fax: +82 2 364 7050; Tel: +82 2 2123 2639; E-mail: mjjun@yonsei.ac.kr*

*b Department of Chemistry, Iowa State University, Ames, Iowa 50011-3111, USA.*

**1. Full synthetic and analytical details**

1-1. 3,5-dimethyl-4-(4-pyridyl)pyrazole (dmpyp)

dmpyp was obtained by the brisk exothermic condensation reaction of 3-(4-pyridyl)acetylacetone1 with hydrazine hydrate in methanol (yield 60 %). Anal. Calc. for C10H11N3: C, 69.34; H, 6.40; N, 24.26. Found: C, 69.11; H, 6.20; N, 24.69 %. 1H NMR (CDCl3, 298 K, 500 MHz):  8.62 (*d*, *J* = 12 Hz, 2H, -py), 7.22 (*d*, *J* = 12 Hz, 2H, -py), 2.37 (*s*, 6H, C*H*3). 13C NMR (CDCl3, 298 K, 125 MHz):  150.11 (-*C*, py), 142.67 (3,5-*C*, pyrazole), 124.08 (*ipso*-*C*, py), 116.17 (4-*C*, pyrazole), 12.23 (*C*H3, pyrazole).

1-2. Potassium hydrotris(3,5-dimethyl-4-(4-pyridyl)pyrazolyl)borate (K**L**)

The reaction of KBH4 with 3,5-dimethyl-4-(4-pyridyl)pyrazole (dmpyp) in a 1:4 mixture at about 220 ºC accompanying brisk evolution of H2 afforded K**L** as white solid (yield 37 %). K**L** is soluble in H2O, MeOH, and EtOH. Anal. Calc. for C30H31BKN9: C, 63.59; H, 5.60; N, 22.60. Found: C, 63.87; H, 5.21; N, 22.32 %. 1H NMR (MeOH-d4, 298 K, 500MHz):  8.47 (*dd*, *J* = 5 Hz, 1 Hz, 2H, -py), 7.38 (*dd*, *J* = 5 Hz, 1 Hz, 2H, -py), 2.29 (*s*, 9H, CH3), 2.10 (*s*, 9H, CH3). 13C NMR (MeOH-d4, 298 K, 125 MHz):  148.61 (-*C*, py), 145.71 (-*C*, py), 142.88 (3,5-*C*, pyrazole), 124.64 (*ipso*-*C*, py), 116.32 (4-*C*, pyrazole), 11.86, 10.57 (*C*H3, pyrazole). IR (KBr, cm−1): 2442 (BH).

1-3. [Ag(**L**)(PPh3)] (**1**)

**1** was obtained by the reaction of Ag+ ion with **L** in the presence of triphenylphosphine in methanol in the 1:1:1 molar ratio. Recrystallizaion of resultant white powder from acetone gives colorless crystals as formula of [Ag(**L**)(PPh3)]·0.5acetone, (yield 75 %). Anal. Calc. for C49H49AgBN9P: C, 64.42; H, 5.41; N, 13.80 Found: C, 64.29; H, 5.57; N, 14.16 %. 1H NMR (CDCl3, 298 K, 500 MHz):  8.53 (*d*, *J* = 12 Hz, 6H, -py), 7.7~7.4 (*m*, 15H, Ph), 7.14 (*d*, *J* = 12 Hz, 6H, -py), 2.52 (*s*, 9H, CH3), 1.97 (*s*, 9H, CH3). 31P NMR (CDCl3, 298 K, 202 MHz): 18.16 (*dd*, *J* = 584.0 Hz, 674.9 Hz). IR (KBr, cm−1): 2529 (BH).

1-4. [[(**1**)(Rh2OAc)4)1.5]·*x*CHCl3]n (**2**·*x*CHCl3)

A solution of **1** (0.072 g, 0.08 mmol) in a mixture of acetonitrile (3 mL) and CHCl3 (3 mL) of was carefully overlayered in a test tube with a solution of Rh2(OAc)4·2pyridine (0.072 g, 0.12 mmol) in CHCl3. In a few days or so red square flat crystals appeared. (0.089 g, 71.4 %). Anal. Calc. for C60H64AgBN9O12PRh3: C, 46.15; H, 4.13; N, 8.07 Found: C, 45.98; H, 3.76; N, 7.88 %. IR (KBr, cm−1): 2532 (BH), 1593, 1430 (OAc). Elemental analysis was performed on sample dried under vacuum for a day because of the efflorescence of the crystals, which is consistent with formula of **2**. (**2**·*x*CHCl3 lost the CHCl3 solvates easily out of mother liquor)

**2. Structural details**


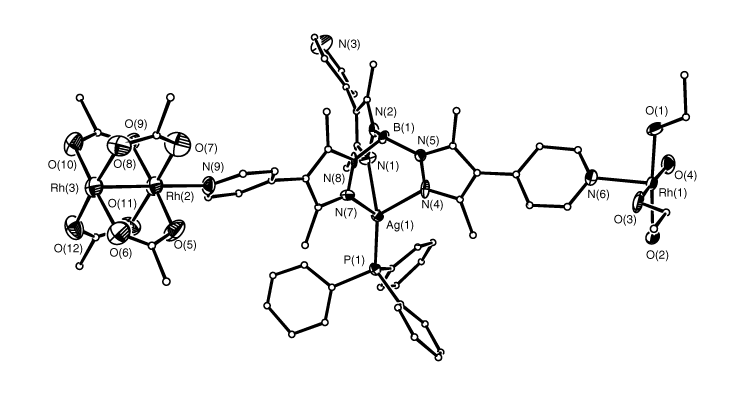


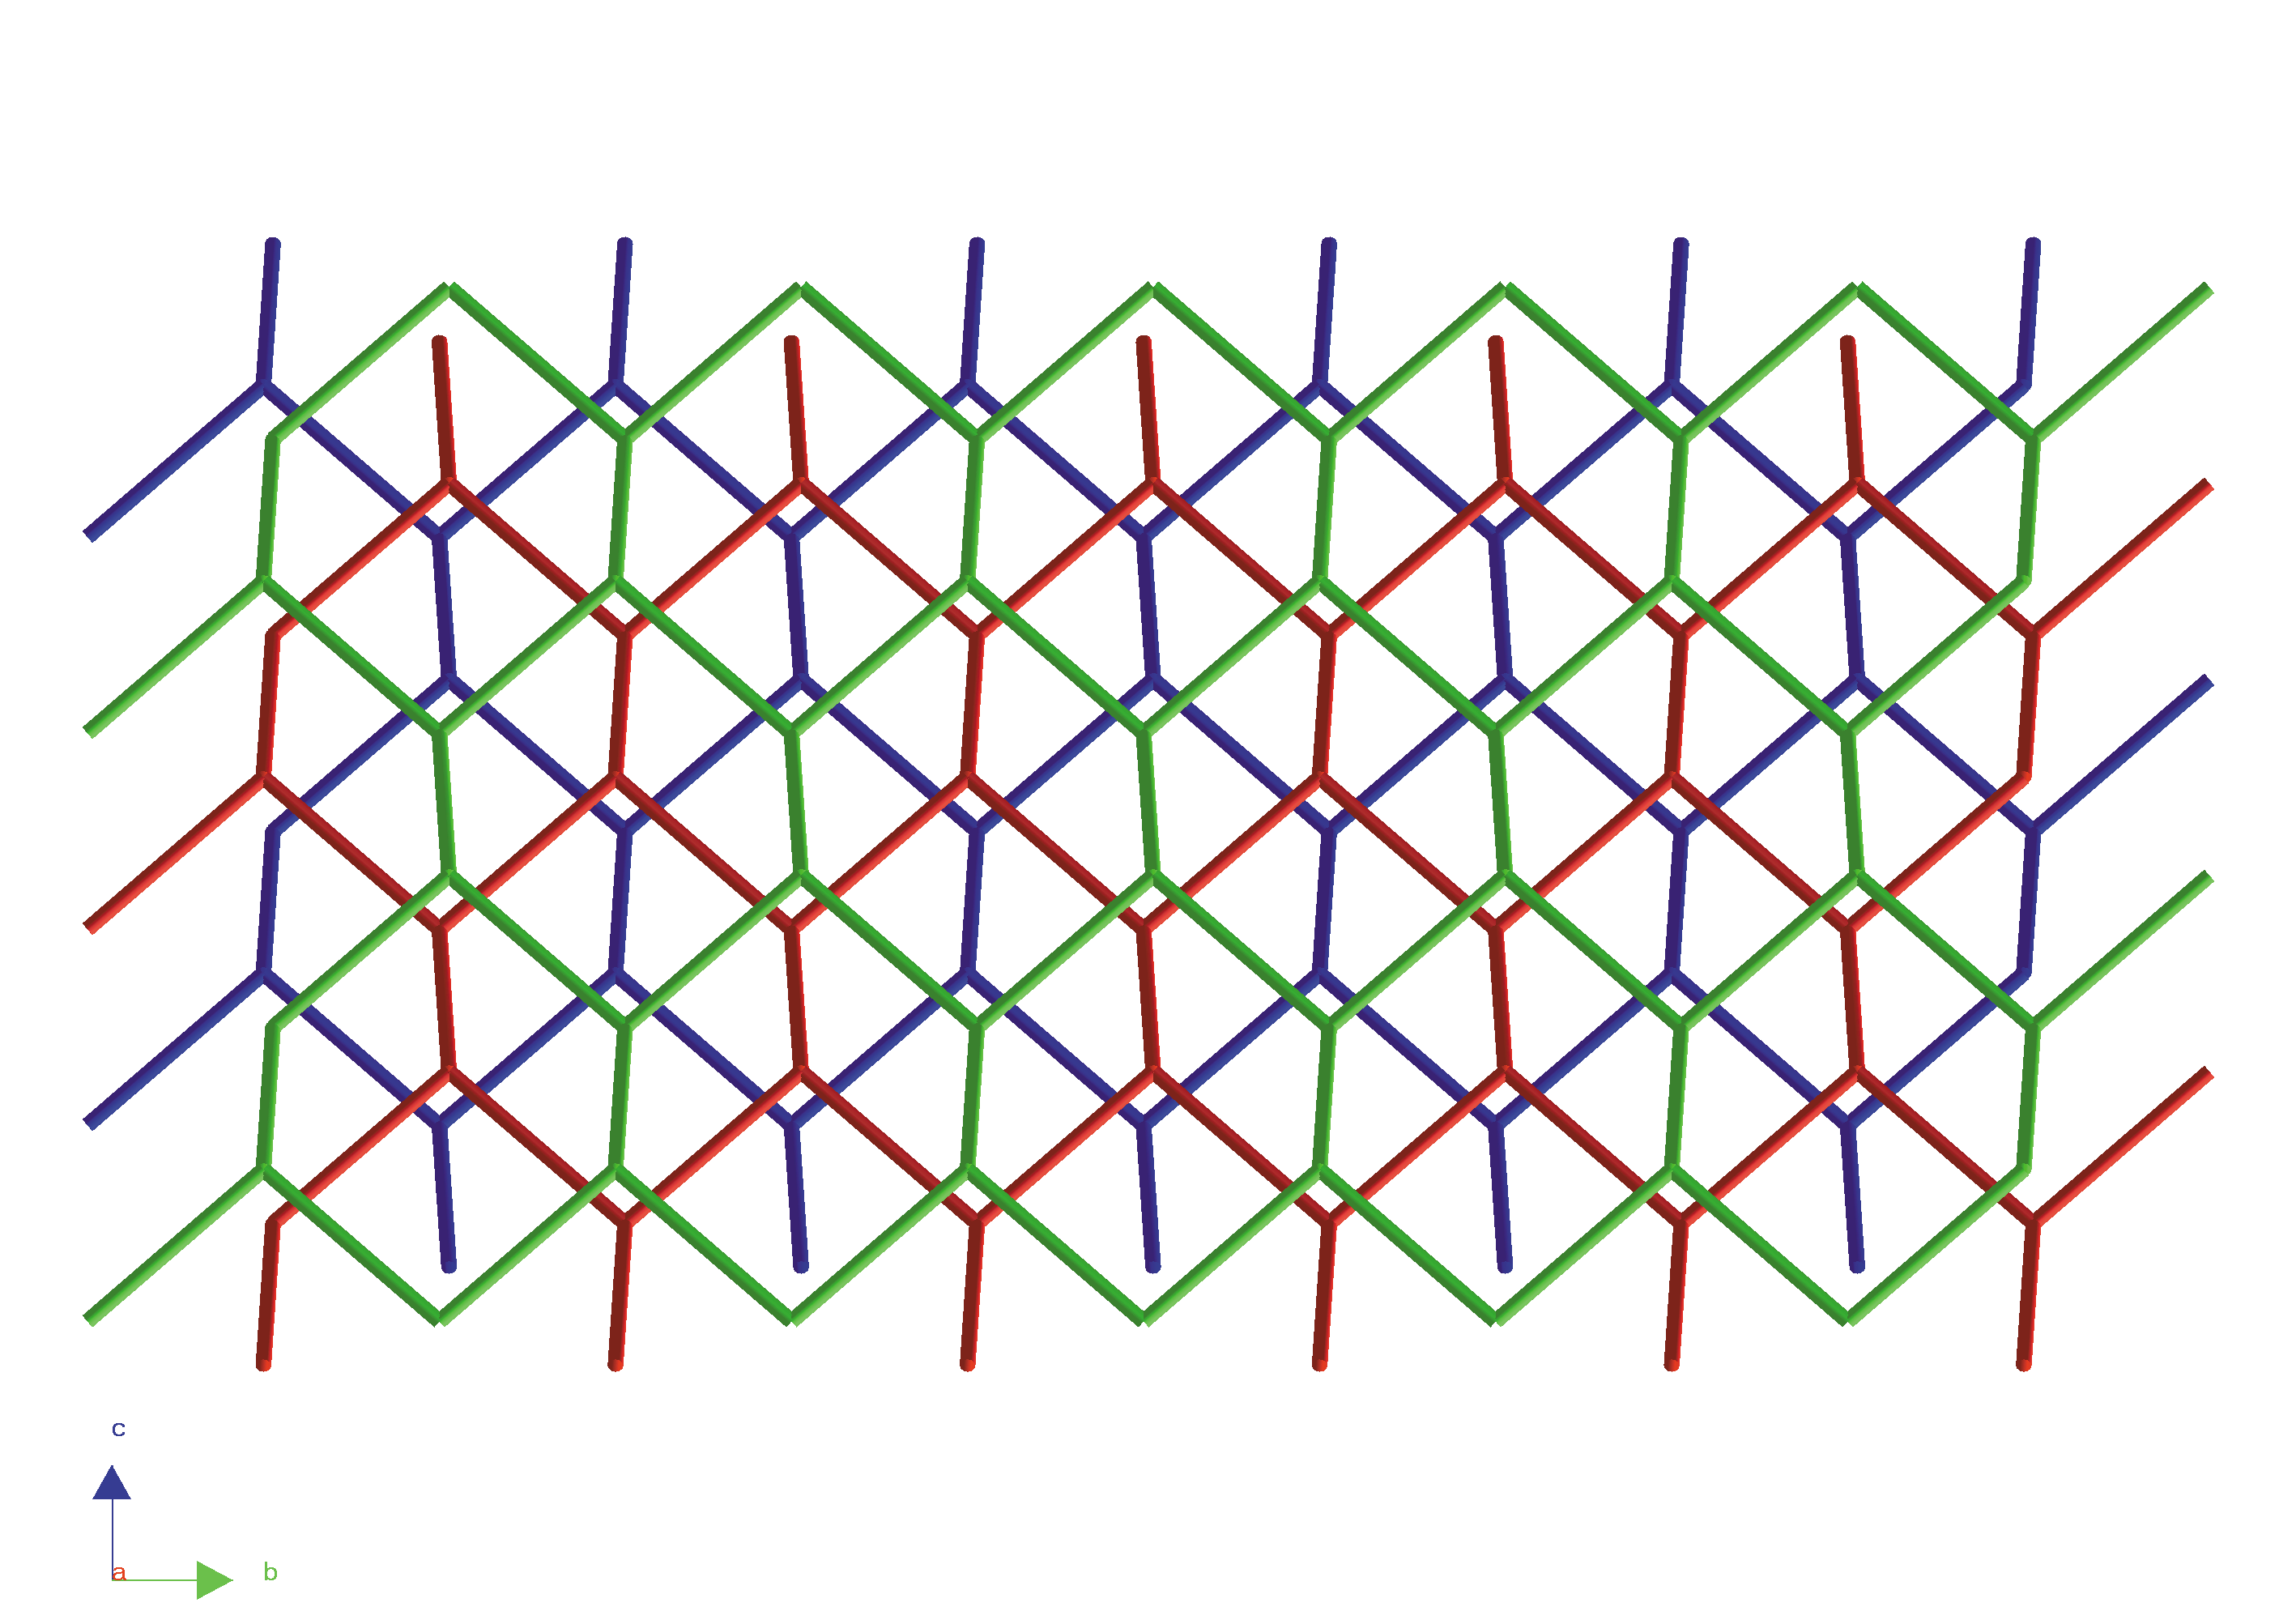
S-1. Asymmetric unit of **2**.The tetrahedral environment of **1** remains intact. Hydrogen atoms are omitted for clarity. Selected bond lengths (Å) and angles (°): Ag(1)−P(1) 2.314(2), Rh(1)−N(6) 2.241(7), Rh(2)−N(9) 2.243(7), Rh(3) #1−N(3) 2.202(8), Rh(1)−Rh(1)#2 2.3923(1), Rh(2)−Rh(3) 2.3951(1); Rh(1)#2−Rh(1)−N(6) 179.2(2), Rh(2)−Rh(3)−N(3)#3 178.5(3), Rh(3)−Rh(2)−N(9) 179.4(2). Symmetry codes: #1, -x+3/2, y+1/2, -z+1/2; #2, -x+1, -y, -z+2; #3, -x+3/2, y-1/2, -z+1/2.


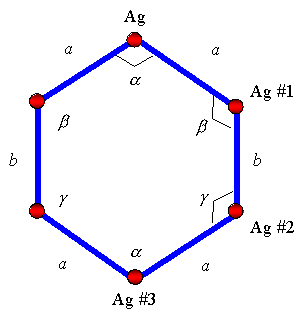


S-2. The dimension of hexagon latticein **2** (*a* = 23.9 Å, *b* = 23.8 Å, α = 98°, β = 112°, γ = 115°). Symmetry Codes: #1, -x+1/2, y+1/2, -z+1/2; #2, x+1/2, -y+1/2, z+1/2; #3, -x, -y, -z.

**3. XRPD study and TGA**

**
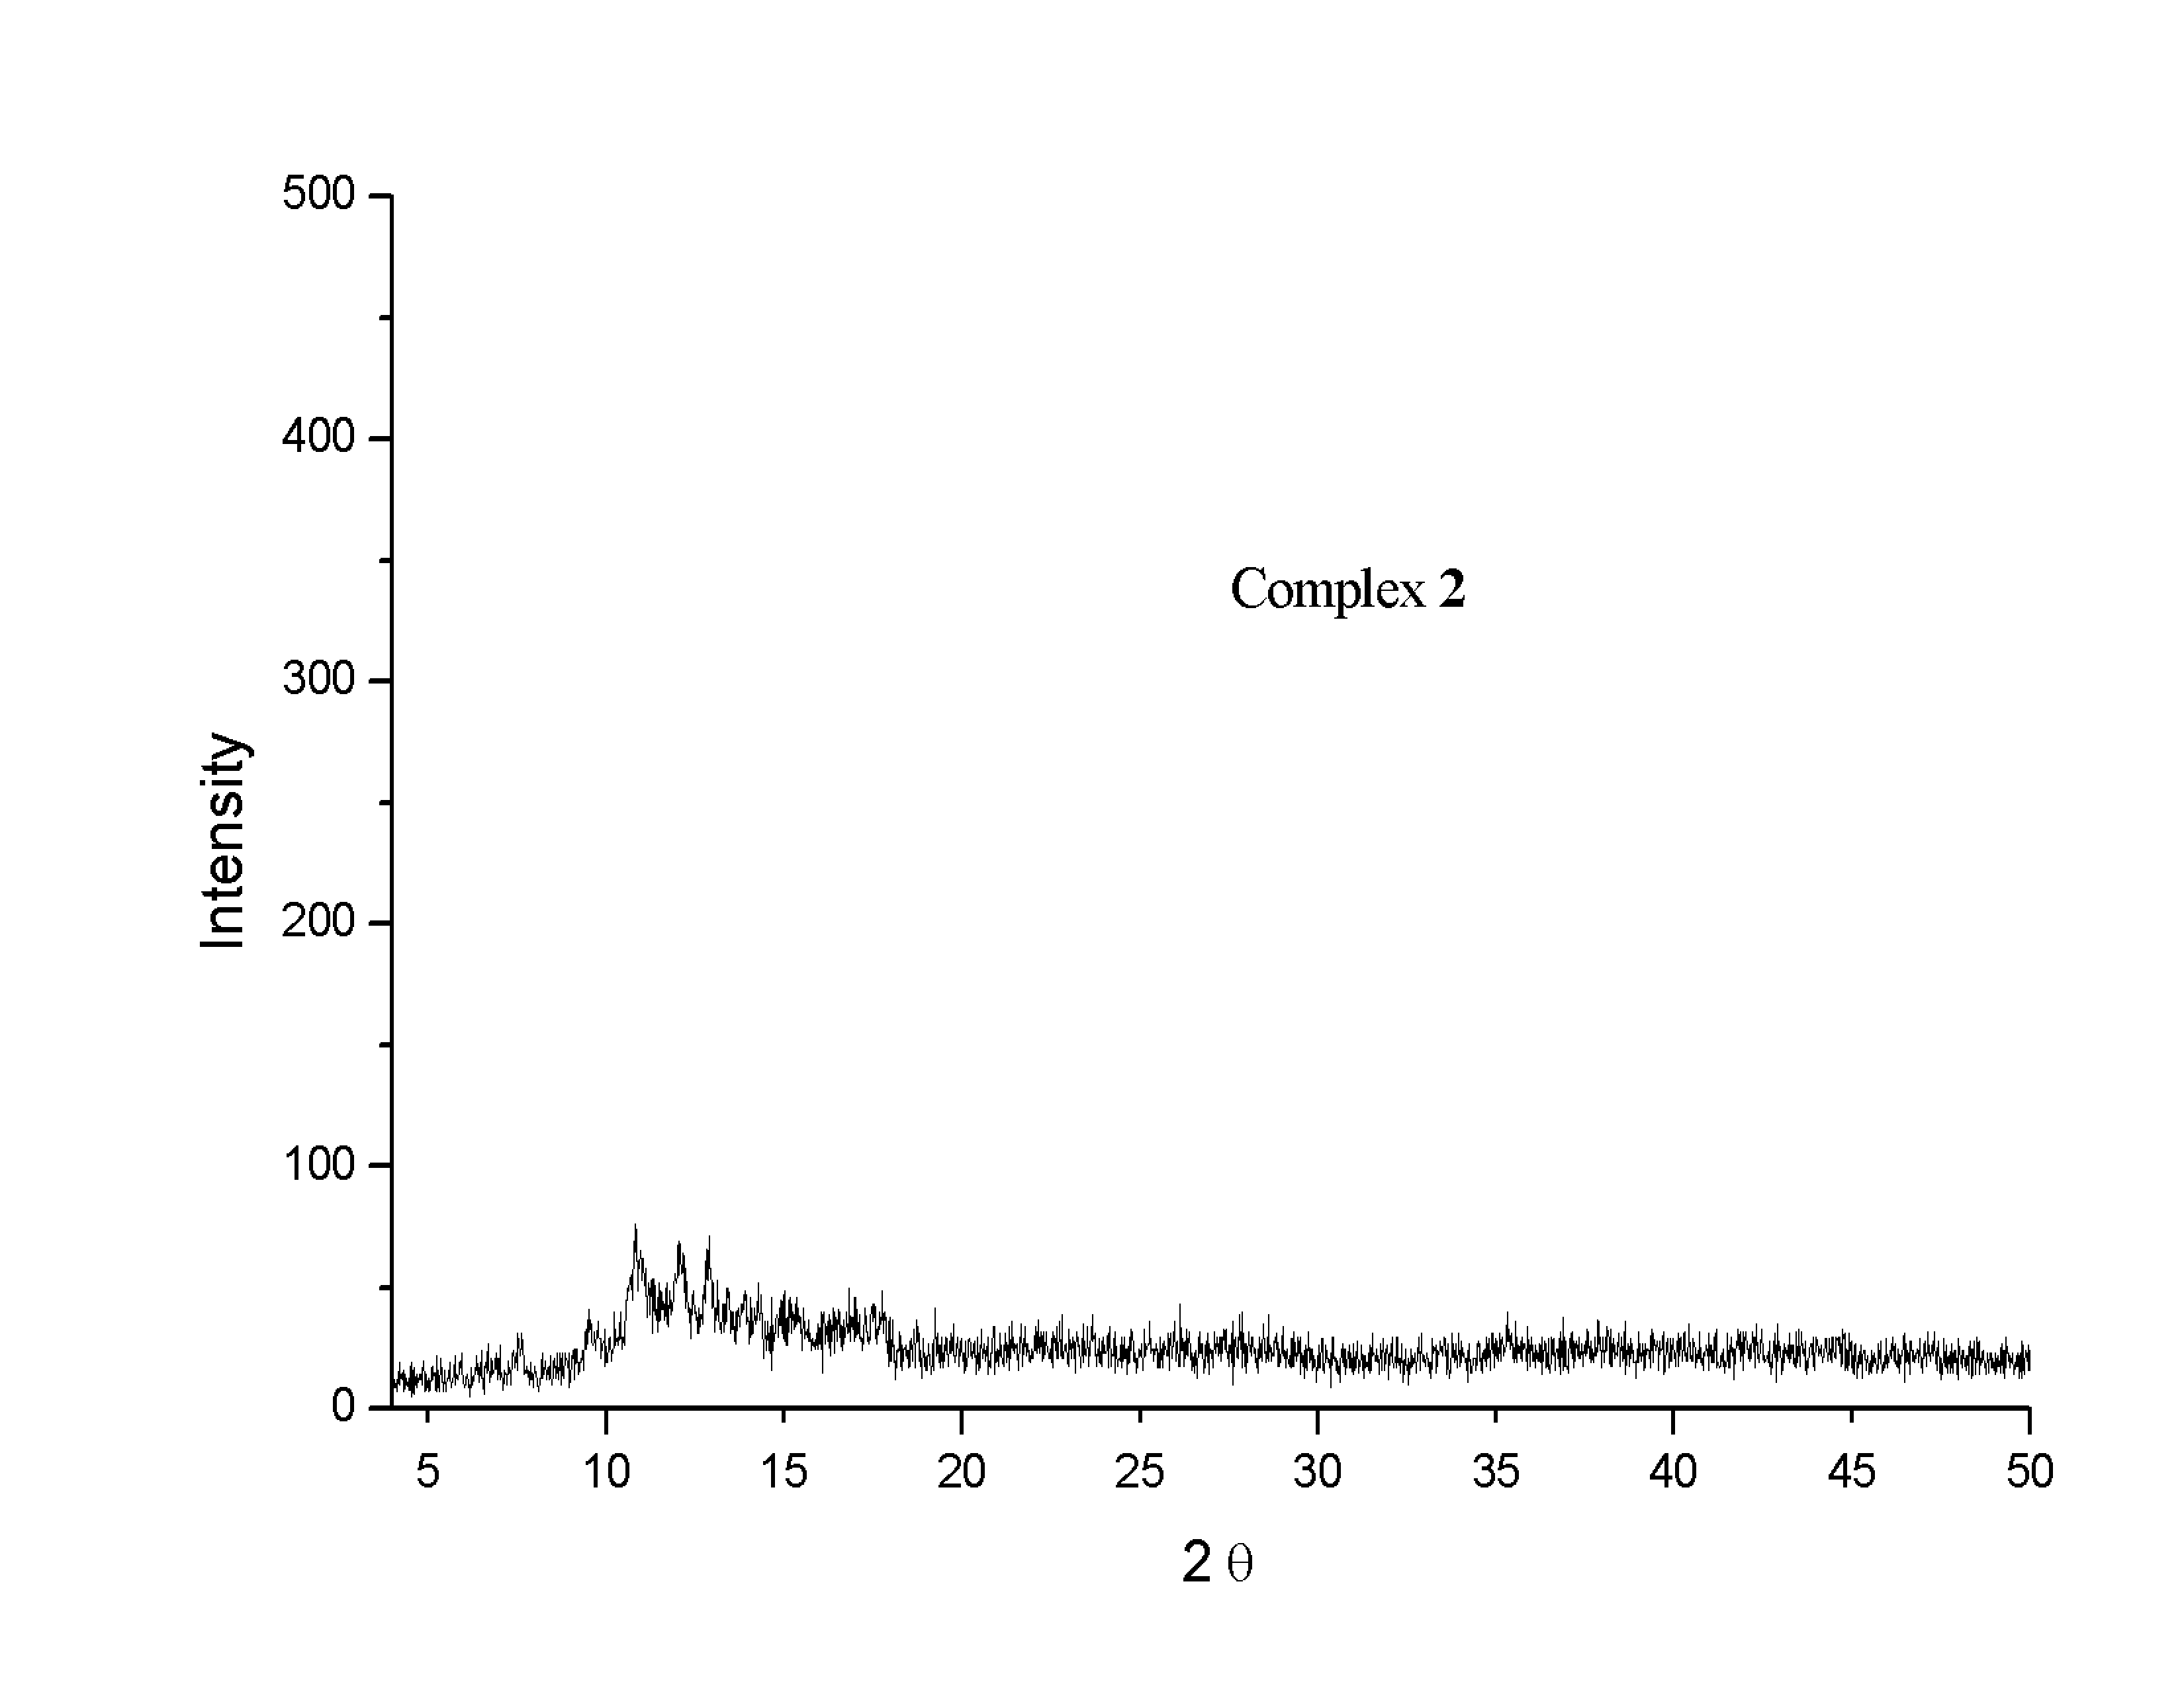

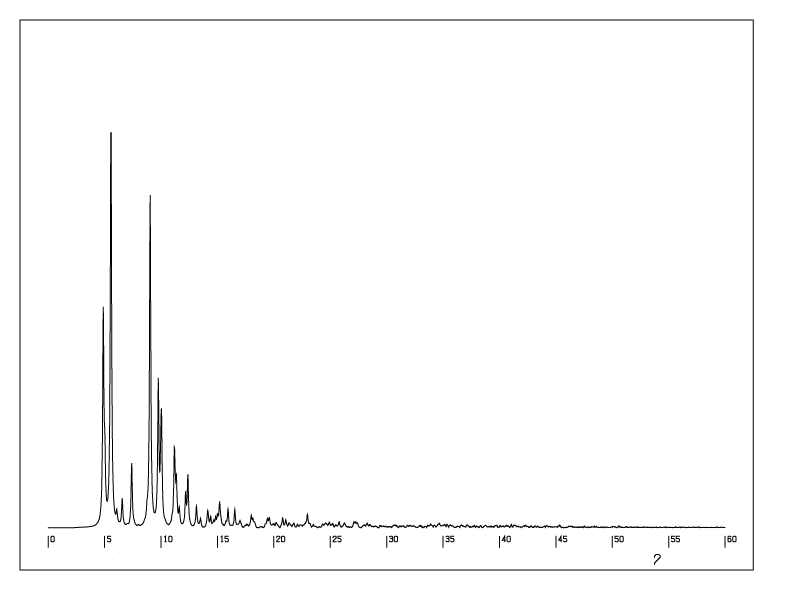
**

S-3. XRPD pattern of dried solid of **2** (left) and simulated pattern (right) obtained from the single crystal X-ray data using Platon programs. The whole framework of **2** collapses on the ground that dried sample of 2 show no XRPD pattern in the low angle (5° < 2θ <10°) compared with simulated pattern.

**
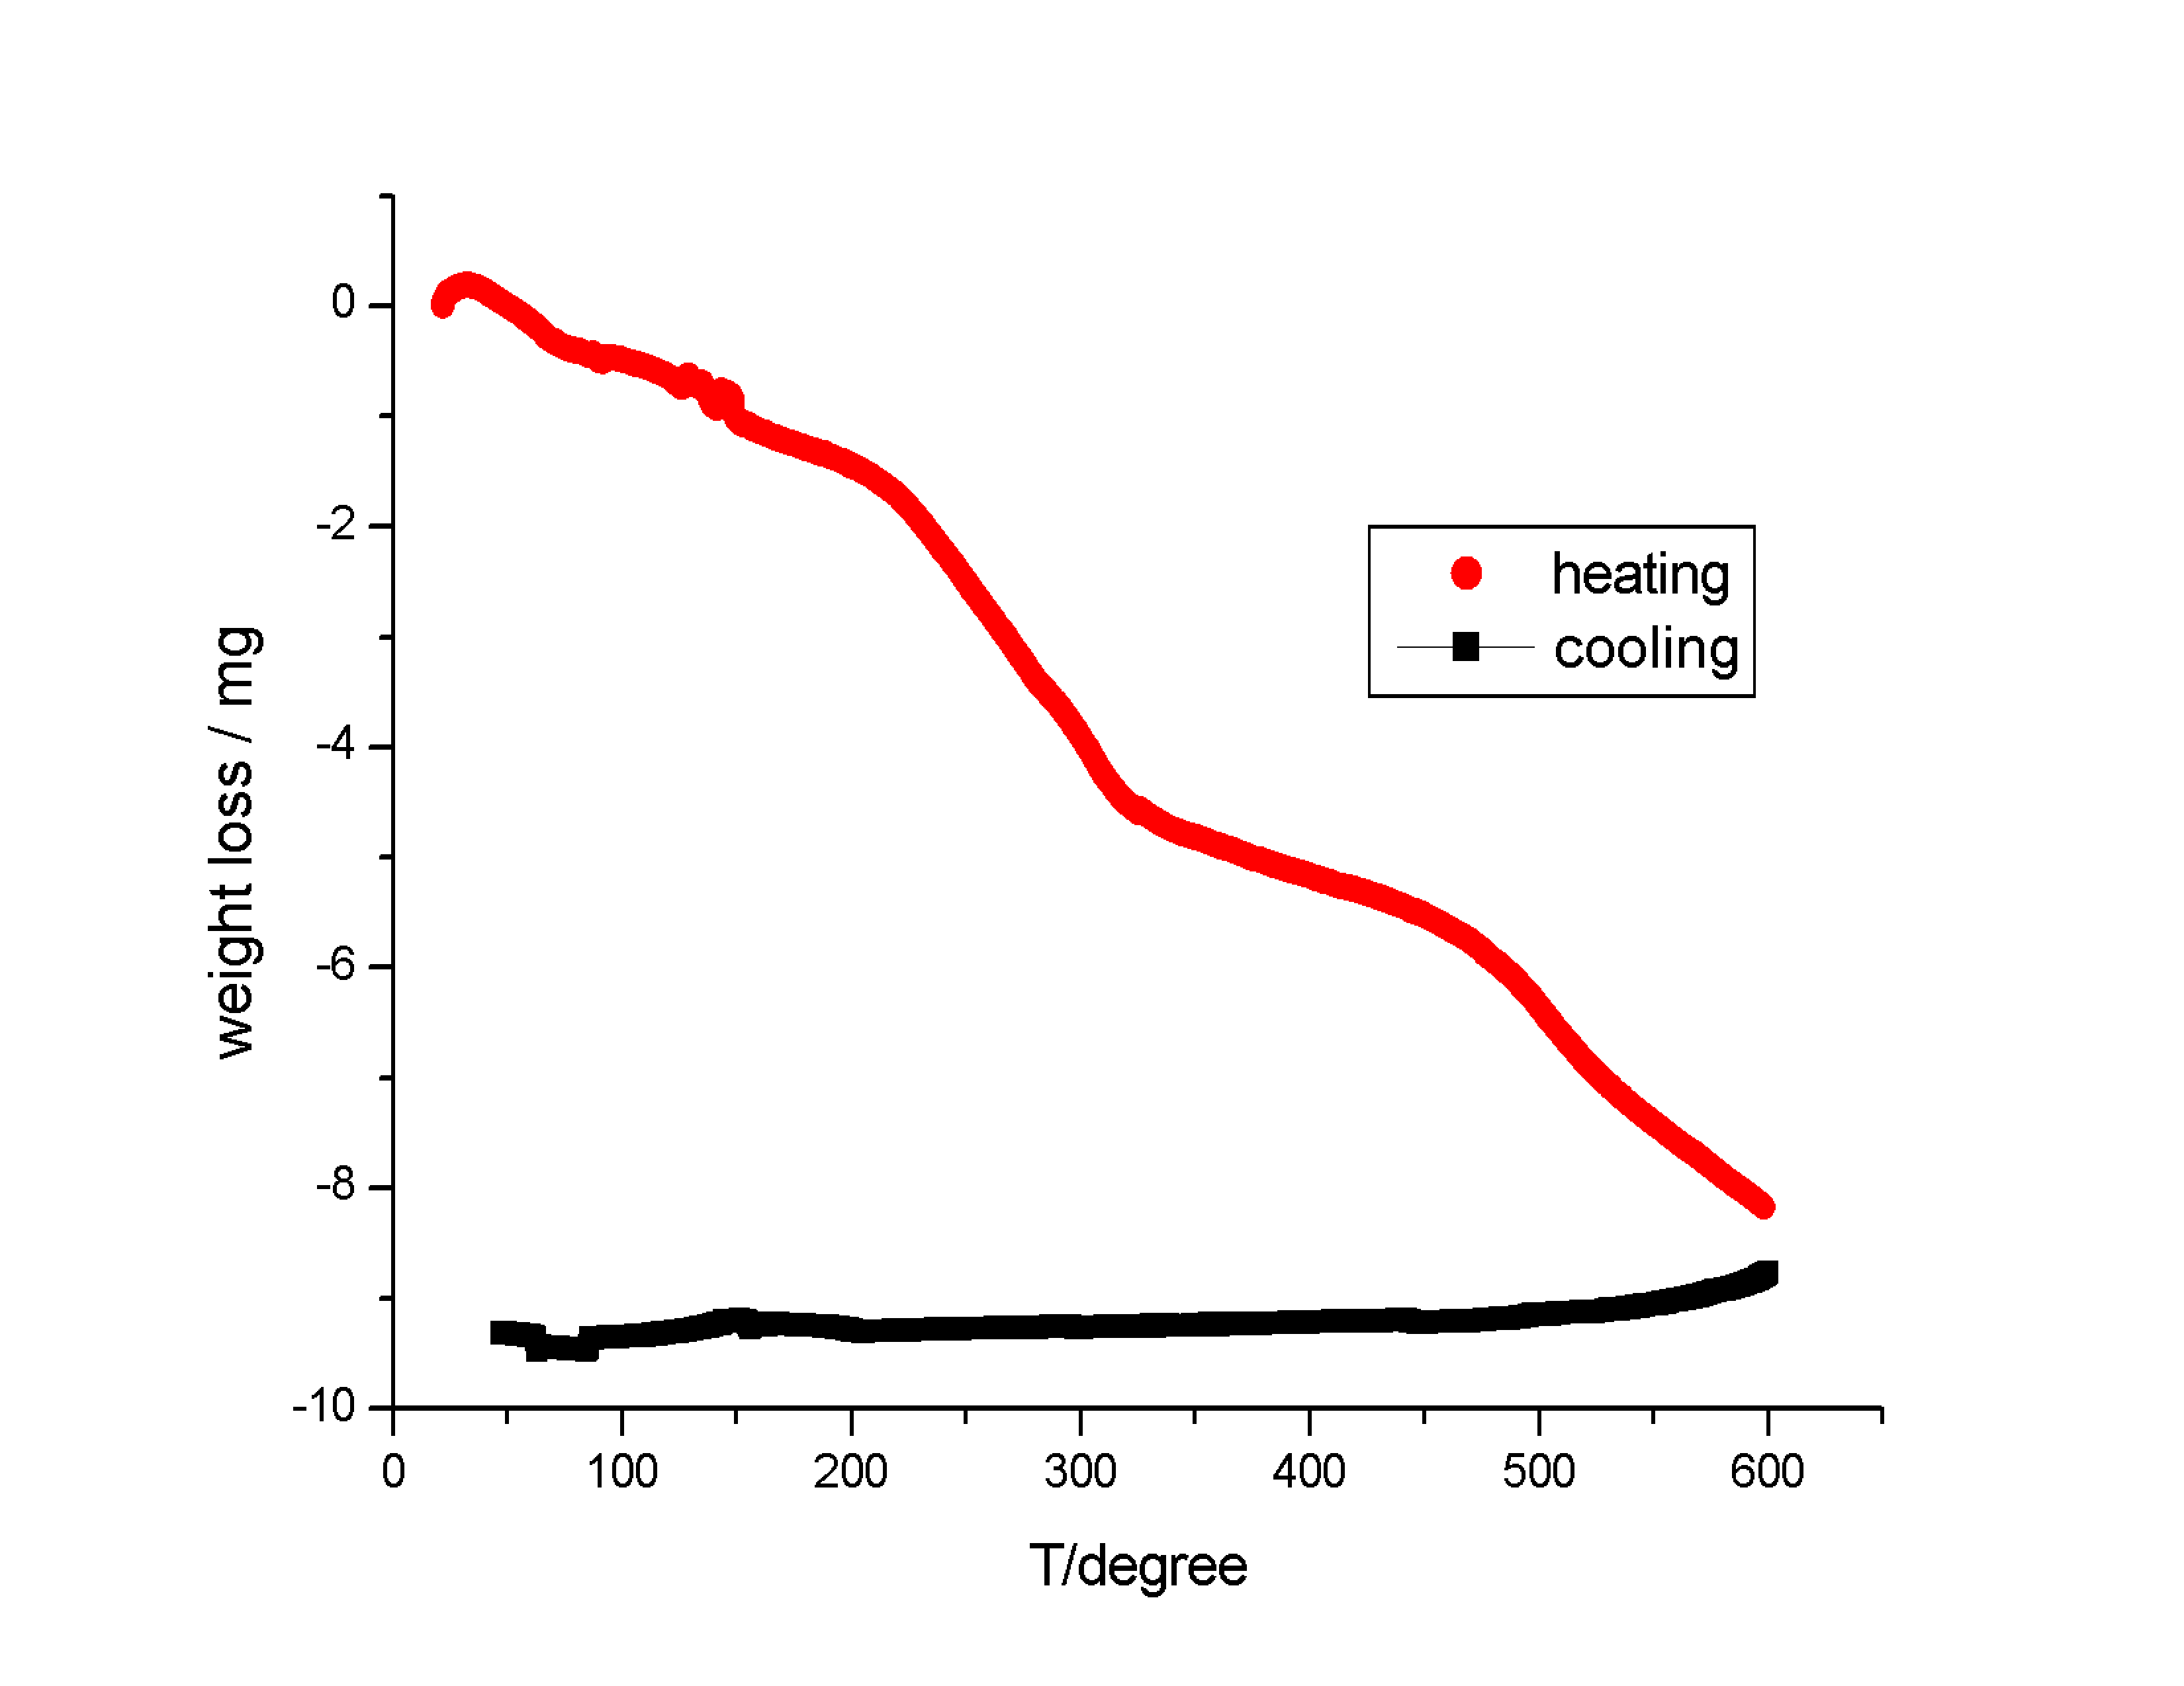
**

S-4. TGA of dried solid of **2** in heating and cooling mode. There is no steep decrease in low temperature, which indicates that dried solid of **2** contains no CHCl3 solvates. The continuous and slow weight loss means that **2** decomposes slowly in the whole temperature range of measurement.

**4. Reference**

1. L. G. Mackay, H. L. Anderson, K. M. Sanders, *J. Chem. Soc., Perkin Trans. 1*, 1995, 2269.
